# Supplementary material for: Prevalence and associated factors related to self-perceived depressive, anxiety and burnout symptoms in medical students of the University of Girona: a cohort study
Source: Research Square preprint supplement (doi:10.21203/rs.3.rs-7983625/v1), 2025-12-09
Supplement: Supplementary file 1 [file 16aa7e4fd607b8f00dc742a2.docx]

***Supplementary information 4***

*Supplementary information Table 1 – Logistic regression adjusting for depression in December*

| **Depression** | B | SE | Sig. | Exp(B) | 95% C.I Exp(B) (inf-sup) | |
| --- | --- | --- | --- | --- | --- | --- |
| Intercept () | -.269 | 3.683 | .942 | .764 |  |  |
| Age | -.083 | .096 | .385 | .920 | .763 | 1.110 |
| Sex | .699 | .449 | .120 | 2.011 | .834 | 4.852 |
| Course |  |  | **.010** |  |  |  |
| Course (1) | -1.750 | 1.014 | .085 | .174 | .024 | 1.269 |
| Course (2) | -.205 | .943 | .828 | .815 | .128 | 5.170 |
| Course (3) | -1.085 | .915 | .236 | .338 | .056 | 2.030 |
| Course (4) | -1.331 | .748 | .075 | .264 | .061 | 1.145 |
| Course (5) | .914 | .707 | .196 | 2.494 | .624 | 9.976 |
| Psychiatry subject | -.719 | .671 | .284 | .487 | .131 | 1.817 |
| Origin |  |  | .070 |  |  |  |
| Origin (1) | -.688 | .782 | .379 | .502 | .109 | 2.326 |
| Origin (2) | -.210 | .776 | .787 | .811 | .177 | 3.712 |
| Origin (3) | .701 | .767 | .361 | 2.016 | .448 | 9.059 |
| Access to Faculty |  |  | .813 |  |  |  |
| Access to Faculty (1) | .706 | 1.248 | .572 | 2.025 | .175 | 23.384 |
| Access to Faculty (2) | .924 | 1.229 | .452 | 2.520 | .227 | 28.041 |
| Access to Faculty (3) | 1.128 | 1.440 | .433 | 3.091 | .184 | 51.930 |
| Tuition scholarship |  |  | .954 |  |  |  |
| Tuition scholarship (1) | -.049 | .449 | .914 | .953 | .395 | 2.295 |
| Tuition scholarship (2) | -.186 | .608 | .759 | .830 | .252 | 2.731 |
| First generation college | .009 | .401 | .982 | 1.009 | .460 | 2.214 |
| Physician parents | .094 | .592 | .873 | 1.099 | .344 | 3.505 |
| Ends meet |  |  | .106 |  |  |  |
| Ends meet (1) | 3.134 | 1.665 | .060 | 22.975 | .880 | 599.920 |
| Ends meet (2) | .279 | .967 | .773 | 1.322 | .199 | 8.796 |
| Ends meet (3) | 1.292 | .631 | **.041** | 3.369 | 1.057 | 12.527 |
| Ends meet (4) | .282 | .543 | .604 | 1.326 | .457 | 3.845 |
| Ends meet (5) | 1.018 | .519 | .050 | 2.767 | 1.000 | 7.655 |
| Living status |  |  | .190 |  |  |  |
| Living status (1) | -.302 | .967 | .755 | .739 | .111 | 4.917 |
| Living status (2) | -.488 | 1.024 | .633 | .614 | .082 | 4.565 |
| Living status (3) | 1.419 | 1.236 | .251 | 4.135 | .367 | 46.579 |
| Couple relationship | -.114 | .377 | .761 | .892 | .426 | 1.867 |
| Chronic disease | .209 | .519 | .687 | 1.233 | .446 | 3.406 |
| Exercise | -.429 | .363 | .237 | .651 | .320 | 1.326 |
| Anxious symptoms | 3.013 | .405 | **< .001** | 20.355 | 9.206 | 45.006 |
| Burnout symptoms | 1.416 | .465 | **.002** | 4.122 | 1.657 | 10.258 |
| AUDIT-C | -.014 | .103 | .893 | .986 | .805 | 1.208 |
| DAST-10 | .461 | .197 | **.020** | 1.585 | 1.076 | 2.334 |
| EX | -.152 | .087 | .079 | .859 | .725 | 1.018 |
| AG | -.018 | .093 | .848 | .982 | .818 | 1.179 |
| CO | -.248 | .118 | **.037** | .781 | .619 | .985 |
| NE | .265 | .107 | **.013** | 1.303 | 1.058 | 1.606 |
| OP | .104 | .102 | .304 | 1.110 | .910 | 1.354 |

*AG: Agreeableness; AUDIT-C: Alcohol Use Disorders Identification Test; CI: Confidence Interval; CO: Conscientiousness; DAST-10: Drug Abuse Screening Test; EX: Extraversion; NE: Neuroticism; OP: Openness; SE: Standard Error; Sig: Statistical significance.*

The p-value for threshold for statistical significance is set at 0.05 (statistically significant results are in bold)

The reference for Access to Faculty is “1st attempt university entrance exam”, with comparisons “2nd attempt or successive university entrance exam” (1), “Other degrees” (2), and “2nd degree/others” (3).

The reference category for Course variable is “1st”, with comparisons “2nd” (1), “3rd” (2), and “4th” (3),

The reference for Ends meet variable is “With great difficulty”, with comparisons “With some difficulties” (2), “With some ease” (3), and “With ease” (4)

The reference for Living status variable is “Cohabitation with biological family”, with comparisons “Cohabitations with other students without biological family” (1), “Cohabitation with people that are neither students nor biological family” (2), and “Residence on yourself” (3).

The reference for Origin variable is “Girona province”, with comparisons “Rest of Catalonia” (1).

The reference for Tuition scholarship variable is “The present year”, with comparisons “In previous years” (1) and “Never” (2).

*Supplementary information 4 Table 2 — Logistic regression adjusting for anxiety in December*

| **Anxiety** | B | SE | Sig. | Exp(B) | 95% C.I Exp(B) (inf-sup) | |
| --- | --- | --- | --- | --- | --- | --- |
| Intercept () | -3.876 | 3.899 | .320 | .021 |  |  |
| Age | -.076 | .105 | .467 | .927 | .755 | 1.138 |
| Sex | .369 | .437 | .398 | 1.447 | .615 | 3.404 |
| Course |  |  | .872 |  |  |  |
| Course (1) | 1.077 | 1.029 | .295 | 2.936 | .391 | 22.060 |
| Course (2) | .473 | .954 | .620 | 1.604 | .547 | 10.414 |
| Course (3) | .614 | .943 | .515 | 1.848 | .291 | 11.734 |
| Course (4) | .626 | .735 | .395 | 1.870 | .443 | 7.904 |
| Course (5) | .496 | .671 | .460 | 1.642 | .441 | 6.115 |
| Psychiatry subject | .396 | .673 | .557 | 1.485 | .397 | 5.556 |
| Origin |  |  | .169 |  |  |  |
| Origin (1) | -.323 | .740 | .662 | .724 | .170 | 3.089 |
| Origin (2) | -.218 | .731 | .765 | .804 | .192 | 3.368 |
| Origin (3) | -1.168 | .735 | .112 | .311 | .074 | 1.313 |
| Access to Faculty |  |  | .121 |  |  |  |
| Access to Faculty (1) | -3.610 | 1.568 | **.021** | .027 | .001 | .585 |
| Access to Faculty (2) | -3.515 | 1.560 | **.024** | .030 | .001 | .633 |
| Access to Faculty (3) | -3.942 | 1.673 | **.019** | .019 | .001 | .516 |
| Tuition scholarship |  |  | .295 |  |  |  |
| Tuition scholarship (1) | .335 | .414 | .418 | 1.398 | .621 | 3.148 |
| Tuition scholarship (2) | .900 | .580 | .121 | 2.459 | .789 | 7.660 |
| First generation college | .238 | .383 | .534 | 1.269 | .599 | 2.691 |
| Physician parents | 1.045 | .610 | .087 | 2.843 | .860 | 9.394 |
| Ends meet |  |  | .195 |  |  |  |
| Ends meet (1) | 1.986 | 2.263 | .380 | 7.283 | .086 | 614.245 |
| Ends meet (2) | 1.261 | .923 | .172 | 3.530 | .578 | 21.560 |
| Ends meet (3) | -.321 | .577 | .578 | .725 | .234 | 2.249 |
| Ends meet (4) | .332 | .502 | .508 | 1.394 | .521 | 3.729 |
| Ends meet (5) | -.586 | .494 | .236 | .556 | .211 | 1.467 |
| Living status |  |  | .404 |  |  |  |
| Living status (1) | 1.432 | 1.087 | .187 | 4.188 | .498 | 35.224 |
| Living status (2) | 1.613 | 1.147 | .160 | 5.019 | .530 | 47.564 |
| Living status (3) | .697 | 1.243 | .575 | 2.008 | .176 | 22.952 |
| Couple relationship | .223 | .359 | .535 | 1.249 | .618 | 2.524 |
| Chronic disease | .482 | .474 | .310 | 1.619 | .639 | 4.103 |
| Exercise | .668 | .354 | .059 | 1.950 | .974 | 3.903 |
| Depressed symptoms | 3.186 | .417 | **< .001** | 24.199 | 10.682 | 54.821 |
| Burnout symptoms | .030 | .412 | .941 | 1.031 | .460 | 2.311 |
| AUDIT-C | .165 | .100 | .100 | 1.180 | .969 | 1.436 |
| DAST-10 | -.217 | .194 | .263 | .805 | .550 | 1.177 |
| EX | -.061 | .083 | .459 | .941 | .800 | 1.106 |
| AG | -.037 | .093 | .693 | .964 | .804 | 1.156 |
| CO | .368 | .117 | **.002** | 1.445 | 1.148 | 1.819 |
| NE | .334 | .094 | **< .001** | 1.396 | 1.161 | 1.680 |
| OP | .021 | .093 | .818 | 1.022 | .851 | 1.226 |

*AG: Agreeableness; AUDIT-C: Alcohol Use Disorders Identification Test; CI: Confidence Interval; CO: Conscientiousness; DAST-10: Drug Abuse Screening Test; EX: Extraversion; NE: Neuroticism;, OP: Openness; SE: Standard Error; Sig: Statistical significance.*

The p-value for threshold for statistical significance is set at 0.05 (statistically significant results are in bold)

The reference category for Course variable is “1st”, with comparisons “2nd” (1), “3rd” (2), “4th” (3), “5th” (4), and “6th” (5).

The reference for Origin variable is “Girona province”, with comparisons “Rest of Catalonia” (1), “Rest of Spain” (2), and “Other countries” (3).

The reference for Access to Faculty is “1st attempt university entrance exam”, with comparisons “2nd attempt or successive university entrance exam” (1), “Other degrees” (2), and “2nd degree/others” (3).

The reference for Tuition scholarship variable is “The present year”, with comparisons “In previous years” (1) and “Never” (2).

The reference for Ends meet variable is “With great difficulty”, with comparisons “With difficulty” (1), “With some difficulties” (2), “With some ease” (3), “With ease” (4), and “With great ease” (5).

The reference for Living status variable is “Cohabitation with biological family”, with comparisons “Cohabitations with other students without biological family” (1), “Cohabitation with people that are neither students nor biological family” (2), and “Residence on yourself” (3).

*Supplementary information 4 Table 3 — Logistic regression adjusting for burnout in December*

| **Burnout** | B | SE | Sig. | Exp(B) | 95% C.I Exp(B) (inf-sup) | |
| --- | --- | --- | --- | --- | --- | --- |
| Intercept () | -.770 | 3.829 | .841 | .463 |  |  |
| Age | -.055 | .105 | .602 | .947 | .770 | 1.164 |
| Sex | -.409 | .421 | .332 | .665 | .291 | 1.518 |
| Course |  |  | **.030** |  |  |  |
| Course (1) | -1.155 | 1.053 | .273 | .315 | .040 | 2.483 |
| Course (2) | -.525 | .924 | .570 | .591 | .097 | 3.615 |
| Course (3) | .071 | .921 | .938 | 1.074 | .166 | 6.533 |
| Course (4) | .992 | .667 | .137 | 2.696 | .729 | 9.967 |
| Course (5) | -.119 | .594 | .842 | .888 | .277 | 2.843 |
| Psychiatry subject | 1.070 | .661 | .105 | 2.916 | .799 | 10.643 |
| Origin |  |  | .302 |  |  |  |
| Origin (1) | .689 | .723 | .340 | 1.992 | .483 | 8.209 |
| Origin (2) | -.266 | .699 | .704 | .767 | .195 | 3.019 |
| Origin (3) | .311 | .702 | .658 | 1.365 | .345 | 5.404 |
| Access to Faculty |  |  | .989 |  |  |  |
| Access to Faculty (1) | .003 | 1.067 | .997 | 1.003 | .124 | 8.119 |
| Access to Faculty (2) | -.098 | 1.050 | .926 | .907 | .116 | 7.102 |
| Access to Faculty (3) | .143 | 1.235 | .908 | 1.154 | .103 | 12.983 |
| Tuition scholarship |  |  | .161 |  |  |  |
| Tuition scholarship (1) | .790 | .429 | .066 | 2.204 | .950 | 5.112 |
| Tuition scholarship (2) | .693 | .533 | .193 | 2.000 | .704 | 5.683 |
| First generation college | .253 | .366 | .490 | 1.287 | .629 | 2.637 |
| Physician parents | -1.287 | .701 | .066 | .276 | .070 | 1.091 |
| Ends meet |  |  | .092 |  |  |  |
| Ends meet (1) | -.857 | 1.422 | .547 | .424 | .026 | 6.889 |
| Ends meet (2) | 1.951 | .851 | **.022** | 7.034 | 1.327 | 37.291 |
| Ends meet (3) | 1.104 | .620 | .075 | 3.016 | .894 | 10.176 |
| Ends meet (4) | 1.178 | .558 | **.035** | 3.248 | 1.089 | 9.688 |
| Ends meet (5) | .347 | .563 | .538 | 1.414 | .469 | 4.262 |
| Living status |  |  | .346 |  |  |  |
| Living status (1) | .753 | 1.020 | .460 | 2.123 | .288 | 15.667 |
| Living status (2) | .016 | 1.083 | .988 | 1.016 | .122 | 8.482 |
| Living status (3) | -.186 | 1.261 | .883 | .831 | .070 | 9.839 |
| Couple relationship | .333 | .365 | .363 | 1.395 | .682 | 2.853 |
| Chronic disease | -.273 | .496 | .583 | .761 | .288 | 2.013 |
| Exercise | .123 | .247 | .723 | 1.131 | .573 | 2.232 |
| Depressed symptoms | 1.484 | .458 | **.001** | 4.409 | 1.797 | 10.817 |
| Anxious symptoms | .001 | .429 | .998 | 1.001 | .432 | 2.319 |
| AUDIT-C | .081 | .097 | .401 | 1.085 | .897 | 1.311 |
| DAST-10 | .030 | .191 | .874 | 1.031 | .708 | 1.500 |
| EX | -.125 | .083 | .131 | .882 | .750 | 1.038 |
| AG | -.083 | .096 | .383 | .920 | .763 | 1.110 |
| CO | -.193 | .110 | .079 | .824 | .664 | 1.023 |
| NE | .143 | .100 | .152 | 1.154 | .949 | 1.403 |
| OP | -.113 | .097 | .243 | .893 | .738 | 1.080 |

*AG: Agreeableness; AUDIT-C: Alcohol Use Disorders Identification Test; CI: Confidence Interval; CO: Conscientiousness; DAST-10: Drug Abuse Screening Test; EX: Extraversion; NE: Neuroticism; OP: Openness; SE: Standard Error; Sig: Statistical significance.*

The p-value for threshold for statistical significance is set at 0.05 (statistically significant results are in bold).

The reference category for Course variable is “1st”, with comparisons “2nd” (1), “3rd” (2), “4th” (3), “5th” (4), and “6th” (5).

The reference for Origin variable is “Girona province”, with comparisons “Rest of Catalonia” (1), “Rest of Spain” (2), and “Other countries” (3).

The reference for Access to Faculty is “1st attempt university entrance exam”, with comparisons “2nd attempt or successive university entrance exam” (1), “Other degrees” (2), and “2nd degree/others” (3).

The reference for Tuition scholarship variable is “The present year”, with comparisons “In previous years” (1) and “Never” (2).

The reference for Ends meet variable is “With great difficulty”, with comparisons “With difficulty” (1), “With some difficulties” (2), “With some ease” (3), “With ease” (4), and “With great ease” (5).

The reference for Living status variable is “Cohabitation with biological family”, with comparisons “Cohabitations with other students without biological family” (1), “Cohabitation with people that are neither students nor biological family” (2), and “Residence on yourself” (3).

*Supplementary information 4 Table 4 – Logistic regression adjusting for depression in February*

| **Depression** | B | SE | Sig. | Exp(B) | 95% C.I Exp(B) (inf-sup) | |
| --- | --- | --- | --- | --- | --- | --- |
| Intercept () | -9.299 | 4.158 | **.025** | .000 |  |  |
| Age | .176 | .126 | .163 | 1.192 | .932 | 1.525 |
| Sex | -.111 | .454 | .806 | .895 | .368 | 2.178 |
| Course |  |  | .058 |  |  |  |
| Course (1) | 2.223 | .993 | **.025** | 9.235 | 1.320 | 64.618 |
| Course (2) | 2.111 | .926 | **.023** | 8.256 | 1.343 | 50.741 |
| Course (3) | 2.486 | .871 | **.004** | 12.011 | 2.177 | 66.255 |
| Course (4) | .983 | .806 | .223 | 2.673 | .550 | 12.982 |
| Course (5) | 1.595 | .821 | .052 | 4.926 | .985 | 24.644 |
| Origin |  |  | .147 |  |  |  |
| Origin (1) | .568 | .656 | .386 | 1.765 | .488 | 6.389 |
| Origin (2) | 1.280 | .680 | .060 | 3.597 | .949 | 13.631 |
| Origin (3) | 1.226 | .684 | .073 | 3.409 | .891 | 13.038 |
| Access to Faculty |  |  | .534 |  |  |  |
| Access to Faculty (1) | 1.832 | 1.457 | .209 | 6.244 | .359 | 180.606 |
| Access to Faculty (2) | 1.758 | 1.409 | .212 | 5.798 | .366 | 91.828 |
| Access to Faculty (3) | 2.372 | 1.603 | .139 | 10.720 | .463 | 248.063 |
| First generation college | -.398 | .429 | .353 | .672 | .290 | 1.556 |
| Physician parents | .574 | .712 | .420 | 1.775 | .440 | 7.162 |
| Chronic disease | .405 | .565 | .474 | 1.499 | .495 | 4.541 |
| Anxious symptoms | 2.467 | .395 | **<.001** | 11.782 | 5.432 | 25.554 |
| Burnout symptoms | 1.548 | .480 | **.001** | 4.700 | 1.833 | 12.053 |

*CI: Confidence Interval; SE: Standard Error; Sig: Statistical significance.*

The p-value for threshold for statistical significance is set at 0.05 (statistically significant results are in bold).

The reference category for Course variable is “1st”, with comparisons “2nd” (1), “3rd” (2), “4th” (3), “5th” (4), and “6th” (5).

The reference for Origin variable is “Girona province”, with comparisons “Rest of Catalonia” (1), “Rest of Spain” (2), and “Other countries” (3).

The reference for Access to Faculty is “1st attempt university entrance exam”, with comparisons “2nd attempt or successive university entrance exam” (1), “Other degrees” (2), and “2nd degree/others” (3).

*Supplementary information 4 Table 5 — Logistic regression adjusting for anxiety in February*

| **Anxiety** | B | SE | Sig. | Exp(B) | 95%C.I Exp(B) (inf-sup) | |
| --- | --- | --- | --- | --- | --- | --- |
| Intercept () | 11.240 | 4.836 | **.020** | 76081.89 |  |  |
| Age | -.401 | .153 | **.009** | .670 | .497 | .903 |
| Sex | .346 | .419 | .409 | 1.413 | .622 | 3.209 |
| Course |  |  | .110 |  |  |  |
| Course (1) | -1.865 | 1.068 | .081 | .155 | .019 | 1.257 |
| Course (2) | -.088 | .906 | .923 | .916 | .155 | 5.404 |
| Course (3) | -.906 | .853 | .288 | .404 | .076 | 2.151 |
| Course (4) | .026 | .764 | .973 | 1.027 | .230 | 4.589 |
| Course (5) | .200 | .742 | .787 | 1.222 | .285 | 5.233 |
| Origin |  |  | .400 |  |  |  |
| Origin (1) | -.324 | .699 | .643 | .723 | .184 | 2.849 |
| Origin (2) | -.306 | .715 | .669 | .736 | .181 | 2.992 |
| Origin (3) | -.934 | .717 | .192 | .393 | .096 | 1.601 |
| Access to Faculty |  |  | .110 |  |  |  |
| Access to Faculty (1) | -3.572 | 1.540 | **.020** | .028 | .001 | .575 |
| Access to Faculty (2) | -3.223 | 1.449 | **.026** | .040 | .002 | .682 |
| Access to Faculty (3) | -3.905 | 1.617 | **.016** | .020 | .001 | .480 |
| First generation college | .404 | .400 | .312 | 1.498 | .684 | 3.291 |
| Physician parents | .560 | .609 | .358 | 1.750 | .530 | 5.780 |
| Chronic disease | -.077 | .508 | .880 | .926 | .342 | 2.506 |
| Depressed symptoms | 2.480 | .397 | **<.001** | 11.943 | 5.481 | 26.024 |
| Burnout symptoms | .330 | .423 | .436 | 1.390 | .606 | 3.189 |

*CI: Confidence Interval; SE: Standard Error; Sig: Statistical significance.*

The p-value for threshold for statistical significance is set at 0.05 (statistically significant results are in bold)

The reference category for Course variable is “1st”, with comparisons “2nd” (1), “3rd” (2), “4th” (3), “5th” (4), and “6th” (5).

The reference for Origin variable is “Girona province”, with comparisons “Rest of Catalonia” (1), “Rest of Spain” (2), and “Other countries” (3).

The reference for Access to Faculty is “1st attempt university entrance exam”, with comparisons “2nd attempt or successive university entrance exam” (1), “Other degrees” (2), and “2nd degree/others” (3).

*Supplementary information 4 Table 6 — Logistic regression adjusting for burnout in February*

| **Burnout** | B | SE | Sig. | Exp(B) | 95% C.I Exp(B) (inf-sup) | |
| --- | --- | --- | --- | --- | --- | --- |
| Intercept () | -34.894 | 16470.235 | .998 | .000 |  |  |
| Age | .420 | .146 | **.004** | 1.522 | 1.144 | 2.024 |
| Sex | .297 | .448 | .508 | 1.345 | .559 | 3.236 |
| Course |  |  | .788 |  |  |  |
| Course (1) | 1.274 | 1.017 | .210 | 3.576 | .488 | 26.226 |
| Course (2) | .663 | .914 | .469 | 1.940 | .323 | 11.642 |
| Course (3) | .857 | .843 | .310 | 2.356 | .451 | 12.300 |
| Course (4) | .910 | .775 | .241 | 2.484 | .543 | 11.353 |
| Course (5) | .959 | .740 | .195 | 2.610 | .612 | 11.126 |
| Origin |  |  | .486 |  |  |  |
| Origin (1) | -.325 | .637 | .610 | .723 | .207 | 2.517 |
| Origin (2) | -.842 | .665 | .206 | .431 | .117 | 1.587 |
| Origin (3) | -.186 | .652 | .776 | .831 | .231 | 2.981 |
| Access to Faculty |  |  | .671 |  |  |  |
| Access to Faculty (1) | 23.360 | 16470.234 | .999 | 1.396E+10 | .000 | . |
| Access to Faculty (2) | 22.909 | 16470.234 | .999 | 889378 | .000 | . |
| Access to Faculty (3) | 22.665 | 16470.234 | .999 | 697018 | .000 | . |
| First generation college | -.239 | .426 | .575 | .788 | .342 | 1.814 |
| Physician parents | .119 | .569 | .834 | 1.126 | .369 | 3.437 |
| Chronic disease | -.433 | .544 | .426 | .649 | .223 | 1.883 |
| Depressed symptoms | 1.535 | .474 | **.001** | 4.643 | 1.833 | 11.764 |
| Anxious symptoms | .345 | .418 | .409 | 1.413 | .623 | 3.205 |

*CI: Confidence Interval; SE: Standard Error; Sig: Statistical significance.*

The p-value for threshold for statistical significance is set at 0.05 (statistically significant results are in bold).

The reference category for Course variable is “1st”, with comparisons “2nd” (1), “3rd” (2), “4th” (3), “5th” (4), and “6th” (5).

The reference for Origin variable is “Girona province”, with comparisons “Rest of Catalonia” (1), “Rest of Spain” (2), and “Other countries” (3).

The reference for Access to Faculty is “1st attempt university entrance exam”, with comparisons “2nd attempt or successive university entrance exam” (1), “Other degrees” (2), and “2nd degree/others” (3).

*Supplementary information 4 Table 7 — Logistic regression adjusting for depression in May*

| **Depression** | B | SE | Sig. | Exp(B) | 95% C.I Exp(B) (inf-sup) | |
| --- | --- | --- | --- | --- | --- | --- |
| Intercept () | 3.397 | 5.440 | .532 | 29.884 |  |  |
| Age | -.061 | .153 | .688 | .941 | .697 | 1.268 |
| Sex | -.481 | .610 | .431 | .618 | .187 | 2.045 |
| Course |  |  | .199 |  |  |  |
| Course (1) | -.124 | 1.319 | .925 | .883 | .067 | 11.717 |
| Course (2) | .127 | 1.144 | .912 | 1.135 | .121 | 10.686 |
| Course (3) | 1.245 | 1.130 | .271 | 3.474 | .379 | 31.833 |
| Course (4) | -.889 | 1.079 | .410 | .411 | .050 | 3.402 |
| Course (5) | .636 | 1.009 | .529 | 1.888 | .261 | 13.635 |
| Origin |  |  | **.012** |  |  |  |
| Origin (1) | -2.060 | 1.023 | **.044** | .127 | .017 | .947 |
| Origin (2) | -.262 | .960 | .785 | .770 | .117 | 5.047 |
| Origin (3) | .078 | .996 | .937 | 1.081 | .154 | 7.613 |
| Access to Faculty |  |  | .993 |  |  |  |
| Access to Faculty (1) | -.360 | 1.613 | .823 | .698 | .030 | 16.456 |
| Access to Faculty (2) | -.237 | 1.536 | .877 | .789 | .039 | 16.003 |
| Access to Faculty (3) | -.366 | 1.854 | .843 | .693 | .018 | 26.245 |
| First generation college | .136 | .524 | .795 | 1.146 | .410 | 3.203 |
| Physician parents | 2.664 | 1.026 | **.009** | 14.354 | 1.920 | 107.280 |
| Chronic disease | .217 | .718 | .762 | 1.243 | .304 | 5.079 |
| Depressed symptoms | 3.643 | .639 | **<.001** | 38.200 | 10.911 | 133.740 |
| Anxious symptoms | 1.908 | .636 | **.003** | 6.740 | 1.937 | 23.451 |
| AUDIT-C | -.159 | .130 | .221 | .853 | .660 | 1.101 |
| DAST-10 | .126 | .361 | .727 | 1.134 | .559 | 2.304 |
| PBL | -.376 | .242 | .120 | .687 | .427 | 1.103 |

*AUDIT-C: Alcohol Use Disorders Identification Test; CI: Confidence Interval; DAST-10: Drug Abuse Screening Test; PBL: Problem-Based Learning; SE: Standard Error; Sig: Statistical significance.*

The p-value for threshold for statistical significance is set at 0.05 (statistically significant results are in bold).

The reference category for Course variable is “1st”, with comparisons “2nd” (1), “3rd” (2), “4th” (3), “5th” (4), and “6th” (5).

The reference for Origin variable is “Girona province”, with comparisons “Rest of Catalonia” (1), “Rest of Spain” (2), and “Other countries” (3).

The reference for Access to Faculty is “1st attempt university entrance exam”, with comparisons “2nd attempt or successive university entrance exam” (1), “Other degrees” (2), and “2nd degree/others” (3).

*Supplementary information 4 Table 8 — Logistic regression adjusting for anxiety in May*

| **Anxiety** | B | SE | Sig. | Exp(B) | 95% C.I Exp(B) (inf-sup) | |
| --- | --- | --- | --- | --- | --- | --- |
| Intercept () | -5.467 | 6.422 | .395 | .004 |  |  |
| Age | -.044 | .179 | .805 | .957 | .674 | 1.358 |
| Sex | 1.093 | .587 | .063 | 2.982 | .944 | 9.422 |
| Course |  |  | .495 |  |  |  |
| Course (1) | 1.591 | 1.430 | .266 | 4.907 | .298 | 80.845 |
| Course (2) | 1.427 | 1.218 | .241 | 4.168 | .383 | 45.403 |
| Course (3) | .090 | 1.163 | .938 | 1.094 | .112 | 10.679 |
| Course (4) | 1.426 | 1.121 | .203 | 4.164 | .463 | 37.447 |
| Course (5) | .531 | .924 | .565 | 1.701 | .278 | 10.405 |
| Origin |  |  | **.049** |  |  |  |
| Origin (1) | 1.610 | .878 | .067 | 5.000 | .895 | 27.947 |
| Origin (2) | .052 | .862 | .952 | 1.053 | .195 | 5.705 |
| Origin (3) | .020 | .869 | .982 | 1.020 | .186 | 5.606 |
| Access to Faculty |  |  | .326 |  |  |  |
| Access to Faculty (1) | -1.191 | 1.544 | .441 | .304 | .015 | 6.270 |
| Access to Faculty (2) | -1.161 | 1.440 | .420 | .313 | .019 | 5.265 |
| Access to Faculty (3) | 1.061 | 1.758 | .546 | 2.891 | .092 | 90.731 |
| First generation college | -.465 | .535 | .385 | .628 | .220 | 1.792 |
| Physician parents | -1.900 | .764 | **.013** | .150 | .033 | .668 |
| Chronic disease | .784 | .722 | .277 | 2.190 | .532 | 9.007 |
| Depressed symptoms | 3.324 | .566 | **<.001** | 27.774 | 9.165 | 84.173 |
| Anxious symptoms | .974 | .593 | .100 | 2.649 | .829 | 8.462 |
| AUDIT-C | -.131 | .130 | .313 | .877 | .679 | 1.132 |
| DAST-10 | -.022 | .321 | .946 | .978 | .522 | 1.836 |
| PBL | .572 | .270 | **.034** | 1.772 | 1.044 | 3.007 |

*AUDIT-C: Alcohol Use Disorders Identification Test; CI: Confidence Interval; DAST-10: Drug Abuse Screening Test; PBL: Problem-Based Learning; SE: Standard Error; Sig: Statistical significance.*

The p-value for threshold for statistical significance is set at 0.05 (statistically significant results are in bold).

The reference category for Course variable is “1st”, with comparisons “2nd” (1), “3rd” (2), “4th” (3), “5th” (4), and “6th” (5).

The reference for Origin variable is “Girona province”, with comparisons “Rest of Catalonia” (1), “Rest of Spain” (2), and “Other countries” (3).

The reference for Access to Faculty is “1st attempt university entrance exam”, with comparisons “2nd attempt or successive university entrance exam” (1), “Other degrees” (2), and “2nd degree/others” (3).

*Supplementary information 4 Table 9 — Logistic regression adjusting for burnout in May*

| **Burnout** | B | SE | Sig. | Exp(B) | 95% C.I Exp(B) (inf-sup) | |
| --- | --- | --- | --- | --- | --- | --- |
| Intercept () | -12.953 | 5.261 | **.014** | .000 |  |  |
| Age | .239 | .130 | .067 | 1.270 | .984 | 1.639 |
| Sex | -.160 | .569 | .778 | .852 | .280 | 2.597 |
| Course |  |  | **.024** |  |  |  |
| Course (1) | 1.641 | 1.392 | .238 | 5.160 | .337 | 78.964 |
| Course (2) | .800 | 1.243 | .520 | 2.226 | .195 | 25.449 |
| Course (3) | -.610 | 1.296 | .638 | .544 | .043 | 6.891 |
| Course (4) | 2.136 | 1.194 | .074 | 8.467 | .815 | 87.923 |
| Course (5) | 1.373 | 1.059 | .195 | 3.946 | .495 | 31.453 |
| Origin |  |  | .094 |  |  |  |
| Origin (1) | 2.115 | .919 | **.021** | 8.287 | 1.368 | 50.194 |
| Origin (2) | 1.210 | .939 | .198 | 3.353 | .532 | 21.126 |
| Origin (3) | 1.612 | .935 | .085 | 5.015 | .802 | 31.366 |
| Access to Faculty |  |  | .452 |  |  |  |
| Access to Faculty (1) | 2.357 | 1.760 | .181 | 10.559 | .335 | 332.733 |
| Access to Faculty (2) | 1.914 | 1.698 | .260 | 6.780 | .243 | 189.203 |
| Access to Faculty (3) | 1.243 | 1.778 | .484 | 3.467 | .106 | 113.133 |
| First generation college | 1.040 | .477 | **.029** | 2.829 | 1.111 | 7.204 |
| Physician parents | .835 | .676 | .217 | 2.306 | .612 | 8.683 |
| Chronic disease | -.409 | .668 | .540 | .664 | .179 | 2.458 |
| Depressed symptoms | 2.057 | .624 | **<.001** | 7.819 | 2.301 | 26.567 |
| Anxious symptoms | 1.078 | .585 | .066 | 2.937 | .933 | 9.252 |
| AUDIT-C | -.070 | .122 | .567 | .933 | .735 | 1.184 |
| DAST-10 | .567 | .364 | .119 | 1.764 | .864 | 3.600 |
| PBL | -.043 | .221 | .847 | .958 | .622 | 1.478 |

*AUDIT-C: Alcohol Use Disorders Identification Test; CI: Confidence Interval; DAST-10: Drug Abuse Screening Test; PBL: Problem-Based Learning; SE: Standard Error; Sig: Statistical significance.*

The p-value for threshold for statistical significance is set at 0.05 (statistically significant results are in bold).

The reference category for Course variable is “1st”, with comparisons “2nd” (1), “3rd” (2), “4th” (3), “5th” (4), and “6th” (5).

The reference for Origin variable is “Girona province”, with comparisons “Rest of Catalonia” (1), “Rest of Spain” (2), and “Other countries” (3).

The reference for Access to Faculty is “1st attempt university entrance exam”, with comparisons “2nd attempt or successive university entrance exam” (1), “Other degrees” (2), and “2nd degree/others” (3).
