# Supplementary material for: Prevalence and associated factors related to self-perceived depressive, anxiety and burnout symptoms in medical students of the University of Girona: a cohort study
Source: Research Square preprint supplement (doi:10.21203/rs.3.rs-7983625/v1), 2025-12-09
Supplement: Supplementary file 2 [file 55497fbb189927421862fa8c.docx]

***Supplementary information 1***

*Supplementary information Table1 – Data collection procedure*

| **Questionnaires** | Data gathering (in months) | | |
| --- | --- | --- | --- |
| 20th-22nd December | 21st-23rd February | 16th-18th May |
| Sociodemographic | ╋ |  |  |
| Short sociodemographic |  | ╋ | ╋ |
| PHQ-9 | ╋ | ╋ | ╋ |
| GAD-7 | ╋ | ╋ | ╋ |
| MBI-SS | ╋ | ╋ | ╋ |
| AUDIT-C | ╋ |  | ╋ |
| DAST-10 | ╋ |  | ╋ |
| BFI-10 | ╋ |  |  |
| PBL |  |  | ╋ |
| Total number of questionnaires (= total amount of questions) | | | |
| 8  (= 85 questions) | 7  (= 70 questions) | 4  (= 40 questions) | 7  (= 68 questions) |

*PHQ-9: Patient Depression Questionnaire (Spanish adaption; GAD-7): General Anxiety Disorder (Spanish adaption); MBI-SS: Maslach Burnout Inventory – Student Survey (Spanish adaption); AUDIT-C: Alcohol Use Disorders Identification Test; DAST-10: Drug Abuse Screening Test; BFI-10: Big Five Inventory; PBL: Problem-Based Learning*

Sociodemographic includes age; sex in which you identify yourself; course; having taken Psychiatry subject; origin; access to Faculty; tuition scholarship; first-generation college/degree; physician parents; ends meet; living status; couple relationship; prior to college chronic disease; exercise (OMS criteria).

Short sociodemographic includes age; sex in which you identify yourself; course; origin; access to Faculty; first-generation college/degree; physician parents; prior to college chronic disease.
