# Supplementary material for: Prevalence and associated factors related to self-perceived depressive, anxiety and burnout symptoms in medical students of the University of Girona: a cohort study
Source: Research Square preprint supplement (doi:10.21203/rs.3.rs-7983625/v1), 2025-12-09
Supplement: Supplementary file 3 [file 9ac5bad78f36c2bc86624463.docx]

***Supplementary information 3***

*Supplementary information Table 3 – Cut-off points of independent variables’ questionnaires*

| **AUDIT-C**  3-item-validated questionnaire Alcohol Use Disorders Identification Test | | | | | | | | | | | | | |
| --- | --- | --- | --- | --- | --- | --- | --- | --- | --- | --- | --- | --- | --- |
| Men: score equal to or higher than 5 | | | | | | | Women: score equal to or higher than 4 | | | | | | |
| **DAST-10** validated drug-abuse 10-item questionnaire Drug Abuse Screening Test | | | | | | | | | | | | | |
| 0 (no drug dependence) | | | | | | | | | | | | | |
| 1 to 2 (low level of drug dependence concern) | | | | | | | | | | | | | |
| 3 to 5 (intermediate level of drug dependence concern) | | | | | | | | | | | | | |
| 6 to 8 (substantial drug dependence concern) | | | | | | | | | | | | | |
| 9 to 10 (serious drug dependence concern) | | | | | | | | | | | | | |
| **BFI-10*** validated Big Five Inventory 10-item questionnaire (BFI-44 abbreviated version) | | | | | | | | | | | | | |
| Emotional Exhaustion: average scores equal to or more than 2.8 | | | | | | | | | | | | | |
| Depersonalisation: average scores equal to or more than 2.25 | | | | | | | | | | | | | |
| Academic Efficacy: average scores equal to or less than 3.84 | | | | | | | | | | | | | |
| strongly agree | | | | | | | | | | | | | |
| agree | | | | | | | | | | | | | |
| neither agree nor disagree | | | | | | | | | | | | | |
| disagree | | | | | | | | | | | | | |
| strongly disagree | | | | | | | | | | | | | |
| **PBL*** *ad hoc* questionnaire *Problem Based Learning* Test | | | | | | | | | | | | | |
| scaled punctuation from 0 to 10 | | | | | | | | | | | | | |

*BFI-10 and PBL questionnaires do not present established cut-off values. Thus, we include score ranks to complete the table, and as it was applied during the study.
