# Supplementary material for: Prevalence and associated factors related to self-perceived depressive, anxiety and burnout symptoms in medical students of the University of Girona: a cohort study
Source: Research Square preprint supplement (doi:10.21203/rs.3.rs-7983625/v1), 2025-12-09
Supplement: Supplementary file 4 [file ebaad15e322b3f5f0d33d0d9.docx]

***Supplementary information 2*** *– Surveys used*

All surveys used, including validated scales and *ad hoc* questionnaires. As students were able to choose between Catalan (normal font) and Spanish (italic font), we present both versions:

**Qüestionari sociodemogràfic***(15 preguntes)*

***Cuestionario sociodemográfico*** *(15 preguntas)*

1. Codi (ex., 357JMX)* _ _ _ _ _ _ _ _ _ _

**u1732507 + Nom del pare: Jaume + Nom de la mare: Maria + Nom dels/de les germans/es per edat: Xavier*

*1. Código (ej., 357JMX)*

**u1732507 + Nombre del padre: Jaume + Nombre de la madre: Maria + Nombre de los/las hermanos/as por edad: Xavier*

2. Edat (en anys)- -

*2. Edad (en años)* - -

3. Sexe amb el qual t’identifiques ☐ Home ☐ Dona ☐ Altres

*3. Sexo con el que te identificas* ☐ *Hombre* ☐ *Mujer* ☐ *Otros*

4. Curs actual (si estàs en més d’un curs, assenyala aquell del qual curses més crèdits)

☐ 1r☐ 2n☐ 3r☐ 4t☐ 5è☐ 6è

*4. Curso actual (si estás en más de un curso, señala aquel del que curses más créditos)*

☐ *1º* ☐ *2º* ☐ *3º* ☐ *4º* ☐ *5º* ☐ *6º*

*4.1. Has cursat el mòdul 1020 “Comportament, Cervell i Òrgans dels sentits 1. Comportament Humà” (Psiquiatria)?*

☐ Sí ☐ No

*4.1. ¿Has cursado el módulo 1020 “Comportamiento, Cerebro y Órganos de los sentidos 1. Comportamiento Humano” (Psiquiatría)?*

☐ *Sí* ☐ *No*

5. Origen

☐ Província de Girona ☐ Resta de Catalunya ☐ Resta d’Espanya ☐ Altres països:_________

*5. Origen*

☐ *Provincia de Girona* ☐ *Resto de Cataluña* ☐ *Resto de España* ☐ *Otros países: ________*

6. Accés a la Facultat

☐ Primer intent de les PAU, EBAU (o proves equivalents)

☐ Segon intent o successius de les PAU, EBAU (o proves equivalents)

☐ Trasllat directe d’una altra Facultat / Universitat

☐ Via de titulació universitària

*6. Acceso a la Facultad*

☐ *Primer intento de las PAU, EBAU (o pruebas equivalentes)*

☐ *Segundo intento de las PAU, EBAU (o pruebas equivalentes)*

☐ *Traslado directo desde otra Facultad / Universidad*

☐ *Vía de titulación universitaria*

7. Accés a beques (MECD, Equitat…)

☐ Sí, aquest any ☐ No, però n’he tingut altres anys ☐ No, mai

*7. Acceso a becas (MECD, Equitat…)*

☐ *Sí, este año*  ☐ *No, pero he tenido otros años* ☐ *No, nunca*

8. Ets la primera generació familiar que arriba a la universitat? ☐ Sí ☐ No

*8. ¿Eres la primera generación familiar que llega a la universidad?* ☐ *Sí* ☐ *No*

9. Algun dels teus progenitors és metge/essa? ☐ Sí ☐ No

*9. ¿Alguno de tus progenitores es médico/a?* ☐ *Sí* ☐ *No*

10. Econòmicament, com acostumes a arribar a final de mes? Amb…

☐ molta dificultat ☐ dificultat ☐ certa dificultat

☐ certa facilitat ☐ facilitat ☐ molta facilitat

*10. Económicamente, ¿cómo sueles llegar a final de mes? Con…*

☐ *mucha dificultad* ☐ *dificultad* ☐ *cierta dificultad*

☐ *cierta facilidad* ☐ *facilidad* ☐ *mucha facilidad*

11. Amb qui vius?

☐ Convivència amb familiars biològics

☐ Convivència amb estudiants no familiars biològics

☐ Convivència amb persones no estudiants ni familiars biològics

☐ Residència en solitari

*11. ¿Con quién vives?*

☐ *Convivencia con familiares biológicos*

☐ *Convivencia con estudiantes no familiares biológicos*

☐ *Convivencia con personas no estudiantes ni familiares biológicos*

☐ *Residencia en solitario*

12. Actualment, tens alguna(es) relació/relacions sentimentals? ☐ Sí ☐ No

*12. Actualmente, ¿tienes alguna(s) relación/relaciones sentimentales?* ☐ *Sí* ☐ *No*

13. Pateixes d’alguna malaltia crònica prèvia a l’entrada a la Facultat? ☐ Sí ☐ No

*13. ¿Sufres de alguna enfermedad crónica previa a la entrada a la Facultad?* ☐ *Sí* ☐ *No*

14. Realitzes un mínim de 150 minuts setmanals d’exercici físic vigorós? ☐ Sí ☐ No

*14. ¿Realizas un mínimo de 150 minutos semanales de ejercicio físico vigoroso?* ☐ *Sí* ☐ *No*

**PHQ-9** *(9+1 preguntes)*

***PHQ-9*** *(9+1 preguntas)*

*Amb quina freqüència has patit els següents problemes durant les dues darreres setmanes?*

*¿Con qué frecuencia te ha molestado alguno de los siguientes problemas durante las últimas 2 semanas?*

Tenir poc interès o plaer en fer les coses

*Poco interés o alegría por hacer cosas*

Sensació d’estar desanimat/da, deprimit/da o sense esperança

*Sensación de estar decaído/a, deprimido/a o desesperanzado/a*

Amb problemes per adormir-se o mantenir-se adormit/da o dormir massa

*Con problemas para quedarse dormido/a, para seguir durmiendo o dormir demasiado*

*Sensació de cansament o de tenir poca energia*

*Sensación de cansancio o de tener poca energía*

Tenir poca gana o menjar massa

*Tener poco apetito o comer demasiado*

Sentir falta d’amor propi o que ets un fracàs o que et deceps a tu mateix/a o a la teva família

*Sentirse mal consigo/a mismo; sentir que eres un/a fracasado/a o que has decepcionado a tu familia o a tí mismo/a*

Tenir dificultats per concentrar-se en coses com llegir el diari o mirar la televisió

*Tener problemas para concentrarse en algo, como leer el periódico o ver la televisión*

T’has mogut o parlat tan a poc a poc que els altres ho puguin haver notat. O a la inversa: has estat tan inquiet/a o agitat/da que t’has estat movent d’un costat a l’altre més de l’habitual

*Te has movido o hablado tan despacio que los demás pueden haberlo notado. O lo contrario: has estado tan inquieto/a o agitado/a que te has estado moviendo de un lado a otro más de lo habitual*

Has tingut pensaments que seria millor estar mort/a o fer-te mal d’alguna manera

*Has tenido pensamientos de que estarías mejor muerto/a o de querer hacerte daño de algún modo*

☐ *Mai* ☐ *Menys de la meitat dels dies* ☐ *Més de la meitat dels dies* ☐ *Gairebé tots els dies*

*Nunca Menos de la mitad de los días Más de la mitad de los días Casi todos los días*

Si has tingut algun d’aquests problemes esmentats en les preguntes anteriors, com t’ha estat de difícil per complir amb el teu treball, tenir cura de la casa o relacionar-te amb altres persones a causa d’aquests problemes?

☐ Gens en absolut ☐ Una mica difícil☐ Molt difícil ☐ Extremadament difícil

*Si has tenido alguno de estos problemas mencionados en las preguntas anteriores, ¿cómo de difícil te ha resultado cumplir con tu trabajo, cuidar de la casa o relacionarte con otras personas debido a estos problemas?*

☐ *Nada en absoluto* ☐ *Un poco difícil* ☐ *Muy difícil* ☐ *Extremadamente difícil*

**GAD-7** *(7 preguntes)*

***GAD-7*** *(7 preguntas)*

Amb quina freqüència has patit els següents problemes durant les dues darreres setmanes?

*¿Con qué frecuencia has sufrido los siguientes problemas en los últimos 15 días?*

T’has sentit nerviós/a, ansiós/a o molt alterat/da?

*¿Te has sentido nervioso/a, ansioso/a o muy alterado/a?*

No has pogut deixar de preocupar-te?

*¿No has podido dejar de preocuparte?*

T’has preocupat excessivament per diferents coses?

*¿Te has preocupado excesivamente por diferentes cosas?*

Has tingut dificultat per relaxar-te?

*¿Has tenido dificultad para relajarte?*

T’has sentit tan intranquil/intranquil·la que no podies estar-te quiet/a?

*¿Te has sentido tan intranquilo/la que no podías estarte quieto/a?*

T’has irritat o enfadat amb facilitat?

*¿Te has irritado o enfadado con facilidad?*

Has tingut por, com si anés a succeir alguna cosa terrible?

*¿Has sentido miedo, como si fuera a suceder algo terrible?*

☐ *Mai* ☐ *Menys de la meitat dels dies* ☐ *Més de la meitat dels dies* ☐ *Gairebé tots els dies*

*Nunca Menos de la mitad de los días Más de la mitad de los días Casi todos los días*

**MBI-SS** *(15 preguntes)*

***MBI-SS*** *(15 preguntas)*

1. Em sento emocionalment esgotat pels meus estudis

*1. Me siento emocionalmente agotado/a por mis estudios*

2. Em sento acabat/da al final del dia a la Universitat

*2. Me siento acabado/a al final del día en la Universidad*

3. Em sento fatigat/da en aixecar-me al matí i haver d’afrontar un altre dia d’universitat

*3. Me siento fatigado/a al levantarme por la mañana y tener que enfrentarme a otro día de universidad*

4. Estudiar tot el dia o posar atenció a una classe realment és estressant per a mi

*4. Estudiar todo el día o atender a una clase realmente es estresante para m*í

5. Em sento cremat/da pels meus estudis

*5. Me siento quemado/a por mis estudios*

6. Des que vaig començar la universitat, he anat perdent interès en els meus estudis

*6. Desde que comencé la universidad, he ido perdiendo interés en mis estudios*

7. He anat perdent l’entusiasme en els meus estudis

*7. He ido perdiendo el entusiasmo en mis estudios*

8. M’he tornat més cínic/a sobre si els meus estudis valen per alguna cosa

*8. Me he vuelto más cínico/a acerca de si mis estudios valen para algo*

9. Dubto sobre el valor dels meus estudis

*9. Dudo sobre el valor de mis estudios*

10. Sóc capaç de resoldre eficaçment els problemes que sorgeixen en el meu estudi

*10*. *Soy capaz de resolver eficazmente los problemas que surgen en mis estudios*

11. Sento que estic fent una contribució eficaç en les classes a les quals assisteixo

*11. Siento que estoy haciendo una contribución eficaz en las clases a las que atiendo*

12. En la meva opinió, sóc un bon estudiant

*12. En mi opinión, soy un/a buen/a estudiante*

13. Em sento realitzat/da quan aconsegueixo els meus objectius d’estudi

*13. Me siento realizado/a cuando logro mis objetivos de estudio*

14. He après moltes coses interessants al llarg dels meus estudis

*14. He aprendido muchas cosas interesantes a lo largo de mis estudios*

15. Durant la classe, estic segur/a que sóc eficaç fent coses

*15. Durante la clase, estoy seguro/a de que soy eficaz haciendo las cosas.*

☐ 0 ☐ 1 ☐ 2 ☐ 3 ☐ 4 ☐ 5 ☐ 6

**AUDIT-C** *(3 preguntes)*

***AUDIT-C*** *(3 preguntas)*

1. En el darrer any, amb quina freqüència prens alguna beguda alcohòlica?

☐ Mai

☐ Un o menys d’un cop al mes (ex: en ocasions especials/rarament)

☐ 2 a 4 cops al mes (ex: només els divendres o cada dos dijous)

☐ 2 o 3 cops a la setmana (ex: divendres-dissabtes o dissabtes-diumenges)

☐ 4 o més vegades per setmana (ex: diàriament o la majoria de dies/setmana)

*1. En el último año, ¿con qué frecuencia consumes alguna bebida alcohólica?*

☐ *Nunca*

☐ *Una o menos veces al mes (ej: en ocasiones especiales/raramente))*

☐ *De 2 a 4 veces al mes (ej: solo los viernes o cada dos jueves)*

☐ *De 2 a 3 veces a la semana (ej: viernes-sábados o sábados-domingos)*

☐ *4 o más veces a la semana (ej: diáriamente o la mayoría de días/semanas)*

2. En el darrer any, quantes consumicions de begudes amb contingut alcohòlic sols fer en un dia de beure normalment?

*2. En el último año, ¿cuántas consumiciones de bebidas alcohólicas sueles realizar en un día de consumo normal?*

☐ 1 o 2 ☐ 3 o 4 ☐ 5 o 6 ☐ 7 a 9 ☐ 10 o més

3. En el darrer any, amb quina freqüència prens 6 o més consumicions alcohòliques en un sol dia?

☐ Mai

☐ Menys d’un cop al mes

☐ Mensualment

☐ Setmanalment

☐ A diari o quasi a diari

*3. En el último año, ¿con qué frecuencia tomas 6 o más bebidas alcohólicas en una sola ocasión de consumo?*

☐ *Nunca*

☐ *Menos de una vez al mes*

☐ *Mensualmente*

☐ *Semanalmente*

☐ *A diario o casi a diario*

**DAST-10** *(1±9 preguntes)*

***DAST-10*** *(1±9 preguntas)*

L’ús de drogues pot afectar la teva salut i l’efecte d’alguns medicaments que prenguis. Si us plau, ajuda’ns a adonar-nos de quina és la realitat a la nostra comunitat universitària responent les següents qüestions amb sinceritat. El terme “abús de drogues” vol dir excés de les indicacions de fàrmacs/drogues prescrites o sense recepta, o bé, qualsevol ús no mèdic de les drogues.

*El uso de drogas puede afectar tu salud y el efecto de algunos medicamentos que tomes. Por favor, ayúdanos a darnos cuenta de cuál es la realidad en nuestra comunidad universitaria respondiendo a las siguientes preguntas con sinceridad. El término “abuso de drogas” significa exceso en las indicaciones de fármacos/drogas prescritas o sin receta, o bien cualquier uso no médico de las drogas.*

1a. Has consumit alguna droga recreativa en els últims 12 mesos? ☐ Sí ☐ No

*1a. ¿Has consumido alguna droga recreativa en los últimos 12 meses?*

*Les següents preguntes són**en relació amb els darrers 12 mesos:*

1b. Quines drogues recreatives* has consumit en els últims 12 mesos? Pots marcar més d’una opció**.**

*1b. ¿Qué drogas recreativas has consumido en los últimos 12 meses? Puedes marcar más de una opción.*

☐ Cànnabis *(marihuana, hash)*

*Cánnabis (marihuana, hash)*

☐ Cocaïna *(crack)*

*Cocaína (crack)*

☐ Inhalants *(paint thinner, aerosol, glue…)*

*Inhalantes (paint thinner, aerosol, glue…)*

☐ Metamfetamines *(speed, crystal)*

*Metanfetaminas (speed, crystal)*

☐Narcòtics *(heroïna, hidrocodona, oxitocina…)*

*Narcóticos (heroína, hidrocodona, oxitocina…)*

☐ Tranquil·litzants *(valium)*

*Tranquilizantes (valium)*

☐ *Altres: _____________________*

*Otros:______________________*

**Recreatives = no requerides per raons mèdiques*

*Recreativas = no requeridas por razones médicas*

2. Sempre ets capaç de parar de consumir drogues quan vols? ☐ Sí ☐ No

*2. ¿Siempre que quieres eres capaz de parar de consumir drogas?*

3. Has tingut mai lipotímies (“blackouts”) o records recurrents (“flashbacks”)

a conseqüència del consum de drogues? ☐ Sí ☐ No

*3. ¿Has tenido pérdidas de memoria (“blackouts”) o te han aparecido*

*"imágenes del pasado" (“flashbacks”) como consecuencia de tu consumo de drogas?*

4. Et sents mai malament o culpable per l’ús de drogues? ☐ Sí ☐ No

*4. ¿Te has sentido alguna vez mal contigo mismo/a o culpable por tu consumo de drogas?*

5. La teva família/parella s’ha queixat mai de la teva implicació en drogues? ☐ Sí ☐ No

*5. ¿Tu pareja o tu familia suelen quejarse de tu consumo de drogas?*

6. Has abandonat mai a la teva família a causa del consum de drogues? ☐ Sí ☐ No

*6. ¿Has desatendido a tu familia a consecuencia de tu consumo de drogas?*

7. Has comès alguna activitat il·legal amb l’objectiu d’aconseguir droga? ☐ Sí ☐ No

*7. ¿Has realizado alguna actividad ilegal para obtener drogas?*

8. Has patit mai síndrome d’abstinència (malestar) en deixar de consumir drogues? ☐ Sí ☐ No

*8. ¿Has notado síntomas de abstinencia (malestar) al dejar de consumir drogas?*

9. Has tingut problemes mèdics com a resultat de l’ús de drogues

(ex: pèrdua de memòria, hepatitis, convulsions, sagnat…)? ☐ Sí ☐ No

*9. ¿Has tenido problemas médicos como consecuencia del consumo de drogas*

*(ex: pérdida de memoria, hepatitis, convulsiones, hemorragias...)?*

**PERSONALITY PROFILE: Big Five Inventory 10 Item questionnaire** *(10 + 1 preguntes)*

***PERSONALITY PROFILE: Big Five Inventory 10 Item questionnaire*** *(10 + 1 preguntas)*

Per conèixer la relació entre l’estil de vida i la salut ens interessa conèixer les teves característiques de personalitat. Llegeix atentament les preguntes que segueixen a continuació i assenyala amb una creu (X) si les següents afirmacions descriuen la teva manera de ser.

*Para conocer la relación entre el estilo de vida y la salud nos interesa conocer tus características de personalidad. Lee atentamente las preguntas que siguen a continuación y señala con una cruz (X) si las siguientes afirmaciones describen tu manera de ser.*

**Em veig a mi mateix/a com una persona que:**

***Me veo a mí mismo/a como una persona que...***

… és reservada

*...es reservada*

… és generalment confiada

*...es generalmente confiada*

… tendeix a ser mandrosa, gandula

*...tiende a ser perezosa*

… és calmada, que porta bé l’estrès

*… es relajada, que maneja bien el estrés*

… té pocs interessos artístics

*… tiene pocos intereses artísticos*

... és extrovertida, sociable

*… es extrovertida, sociable*

… tendeix a trobar defectes en els altres

*… tiende a encontrar defectos en los demás*

… és meticulosa amb el que fa

*… es meticulosa en lo que hace*

… es posa nerviosa fàcilment

*… se pone nerviosa fácilmente*

… té una imaginació activa

*… tiene una gran imaginación*

… és considerada i amable amb quasi tothom

*… es considerada y amable con casi todo el mundo*

☐ Absolutament d’acord ☐ Força d’acord ☐ Ni d’acord ni en desacord

*Muy de acuerdo De acuerdo Ni deacuerdo ni en desacuerdo*

☐ Força en desacord ☐ Absolutament en desacord

*En desacuerdo Muy en desacuerdo*

**QÜESTIONARI D’OPINIÓ AMB LA METODOLOGIA ABP** *(15 preguntes)*

***CUESTIONARIO DE OPINIÓN CON LA METODOLOGÍA ABP*** *(15 preguntas)*

1. En termes generals, en una escala de l’1 al 10* quin és el teu grau de satisfacció amb la metodologia ABP (classes i treball individual)?

*1. En términos generales, en una escala del 0 al 10*,¿cuál es tu grado de satisfacción con la metodología ABP (clases y trabajo individual)?*

2. Quin grau d’estrés mantingut creus que provoca la metodologia ABP al llarg de tot el curs?

*2. ¿Qué grado de estrés mantenido crees que provoca la metodología ABP a lo largo de todo el curso?*

3. En quin grau consideres que les sessions (classes) ABP…

*3. Con qué grado consideras que las sesiones (clases) ABP...*

3.1. ...solen ser profitoses per assolir els continguts proposats?

*3.1. ...¿suelen ser provechosas para alcanzar los contenidos propuestos?*

3.2. ...són massa estressants?

*3.2. …¿son demasiado estresantes?*

3.3. ...treuen temps pel treball individual del mòdul?

*3.3. ...¿quitan tiempo para el trabajo individual del módulo?*

4. En relació al que consideres sobre la metodologia ABP: fins a quin punt/grau trobes que…

*4. En relación con lo que consideras sobre la metodología ABP: ¿hasta qué punto/grado crees que...*

4.1. ...millora les teves habilitats per resoldre conflictes ètics?

*4.1. ...¿mejora tus habilidades para resolver conflictos éticos?*

4.2. ...millora les teves habilitats de comunicació?

*4.2. ...¿mejora tus habilidades de comunicación?*

4.3. ...et fa sentir més autosuficient en el procés d’aprenentatge?

*4.3. ...¿te hace sentir más autosuficiente en el proceso de aprendizaje?*

4.4 ...t’ajuda a gestionar millor l’estrès?

*4.4. ...¿te ayuda a gestionar mejor el estrés?*

4.5 ...et suposa més expectatives i autoexigències que amb altres metodologies docents? (en cas de tenir-ne experiència)

*4.5. ...¿te supone más expectativas y autoexigencias que otras metodologías docentes? (en caso de tener experiencia)*

4.6. ...fomenta el treball en equip?

*4.6. ...¿fomenta el trabajo en equipo?*

4.7. ...potencia l’individualisme o la rivalitat?

*4.7. ...¿potencia el individualismo o la rivalidad?*

4.8. ...haver estudiat amb aquesta metodologia et serà beneficiós per al teu coneixement en medicina?

*4.8*. ...*¿haber estudiado con esta metodología te será beneficioso para tu conocimiento en medicina?*

4.9 ...t’ajudarà per a la preparació de l’examen MIR (o proves equivalents)?

*4.9. …¿te ayudará para la preparación del examen MIR (o pruebas equivalentes)?*

4.10. ...t’haurà permès aprendre i adquirir habilitats útils per quan treballis?

*4.10. …¿te habrá permitido aprender y adquirir habilidades útiles para cuando trabajes?*

*De l’1 al 10 / *del 1 al 10* =

☐ 1 ☐ 2 ☐ 3 ☐ 4 ☐ 5 ☐ 6 ☐ 7 ☐ 8 ☐ 9 ☐ 10
